# Supplementary material for: The Mode of SN38 Derivatives Interacting with Nicked DNA Mimics Biological Targeting of Topo I Poisons
Source: MDPI journal article supplement (doi:10.3390/ijms22147471), 2021-07-12
Supplement: s1 [file s1]

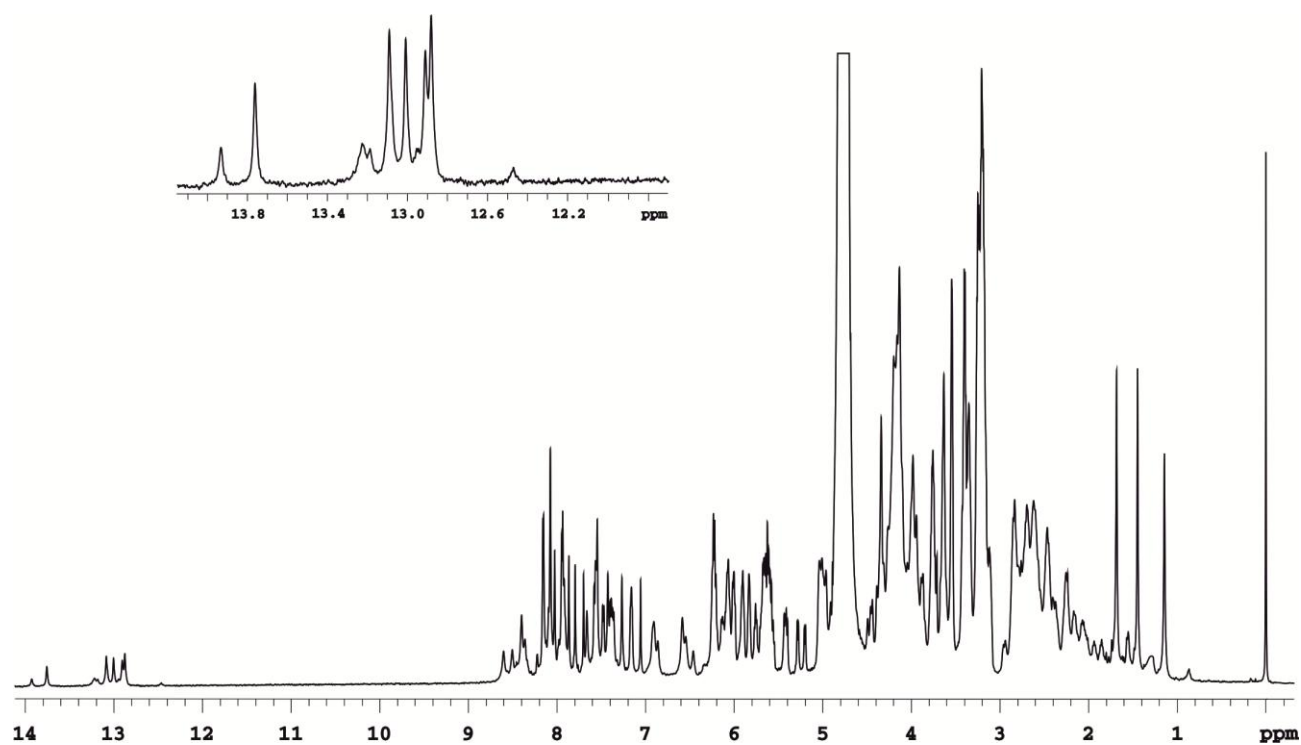

**Fig. S1** The  $^1\text{H}$  NMR spectrum of nicked decamer **1** in buffered  $\text{H}_2\text{O}/\text{D}_2\text{O}$ , (90/10 vol%) 25 mM NaCl /25 mM  $\text{K}_3\text{PO}_4$ , at pH 6. Seven guanosine and 3 thymidine NHs hydrogen bonded, forming a duplex are shown in an inset.

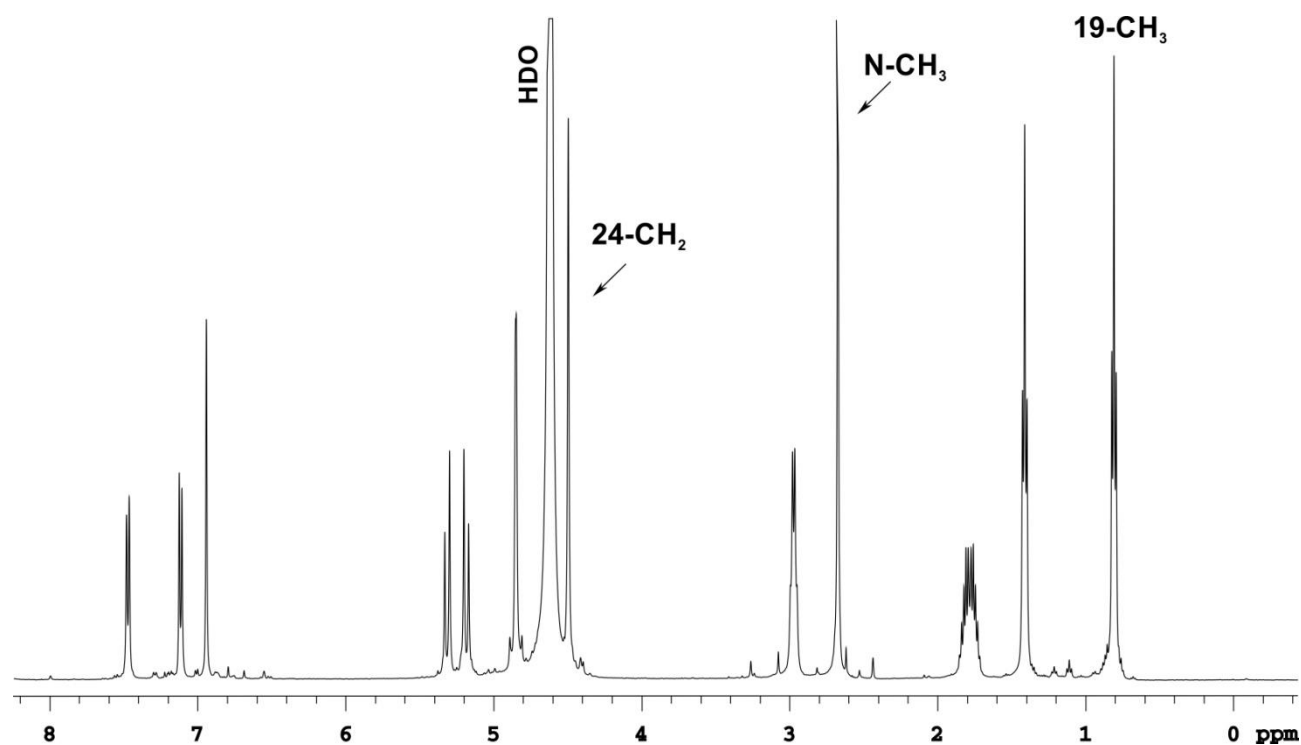

**Fig. S2** The  $^1\text{H}$  NMR spectrum of **2** in buffered  $\text{D}_2\text{O}$ , 25 mM NaCl /25 mM  $\text{K}_3\text{PO}_4$ , at pH 6.

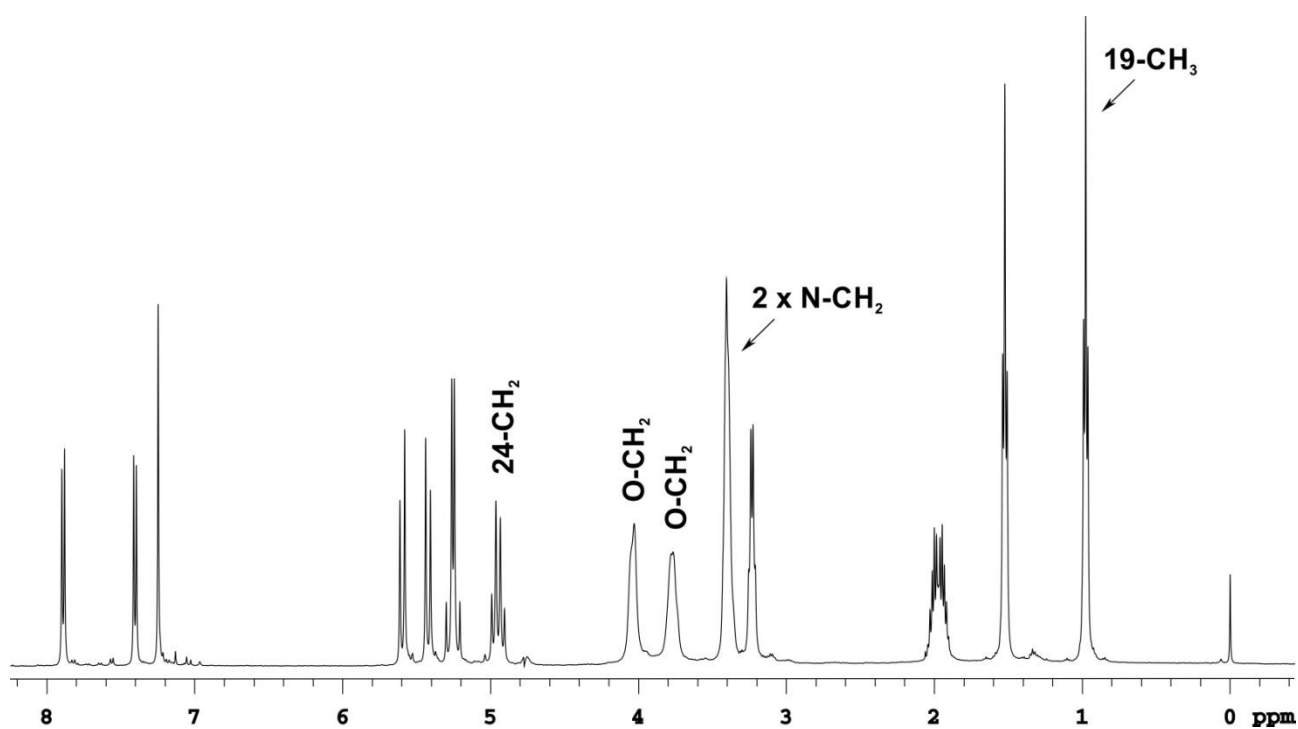

**Fig.S3** The <sup>1</sup>H NMR spectrum of **3** in buffered D<sub>2</sub>O, 25 mM NaCl /25 mM K<sub>3</sub>PO<sub>4</sub>, at pH 6.

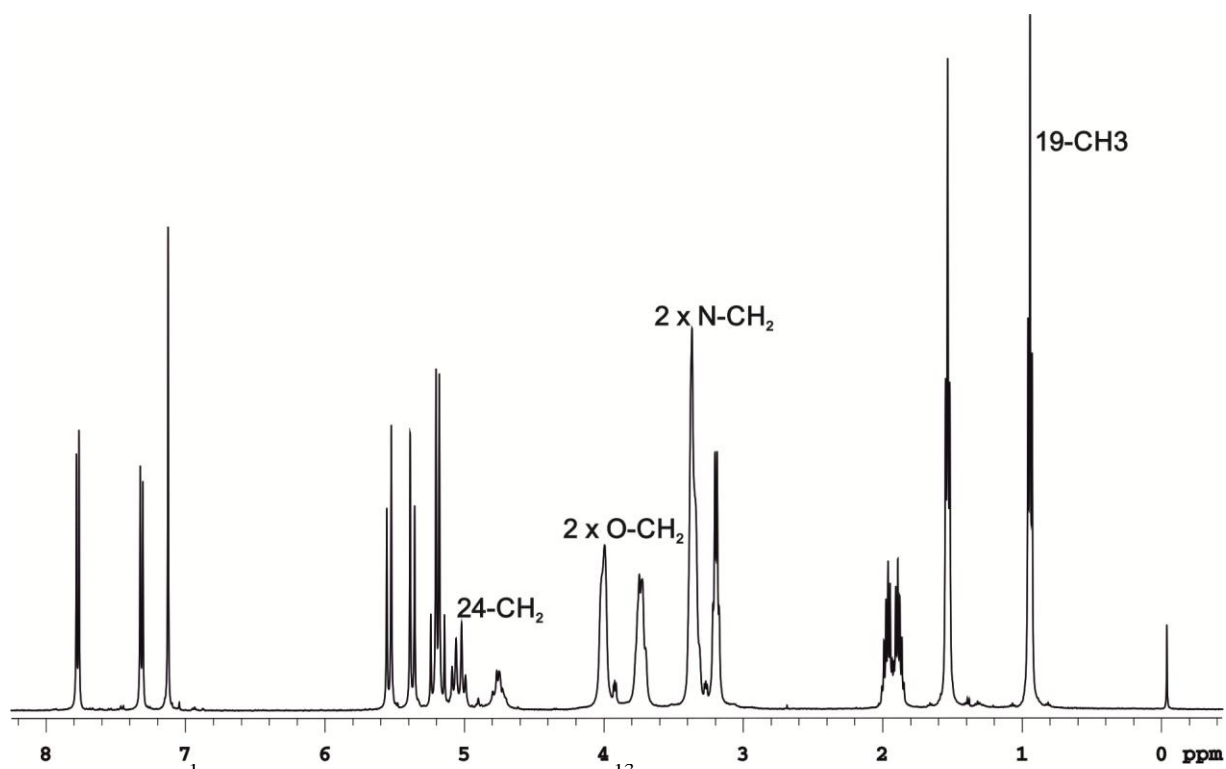

**Fig.S3a** The <sup>1</sup>H NMR spectrum of **3** enriched <sup>13</sup>C-24 in buffered D<sub>2</sub>O, 25 mM NaCl /25 mM K<sub>3</sub>PO<sub>4</sub>, at pH 6.

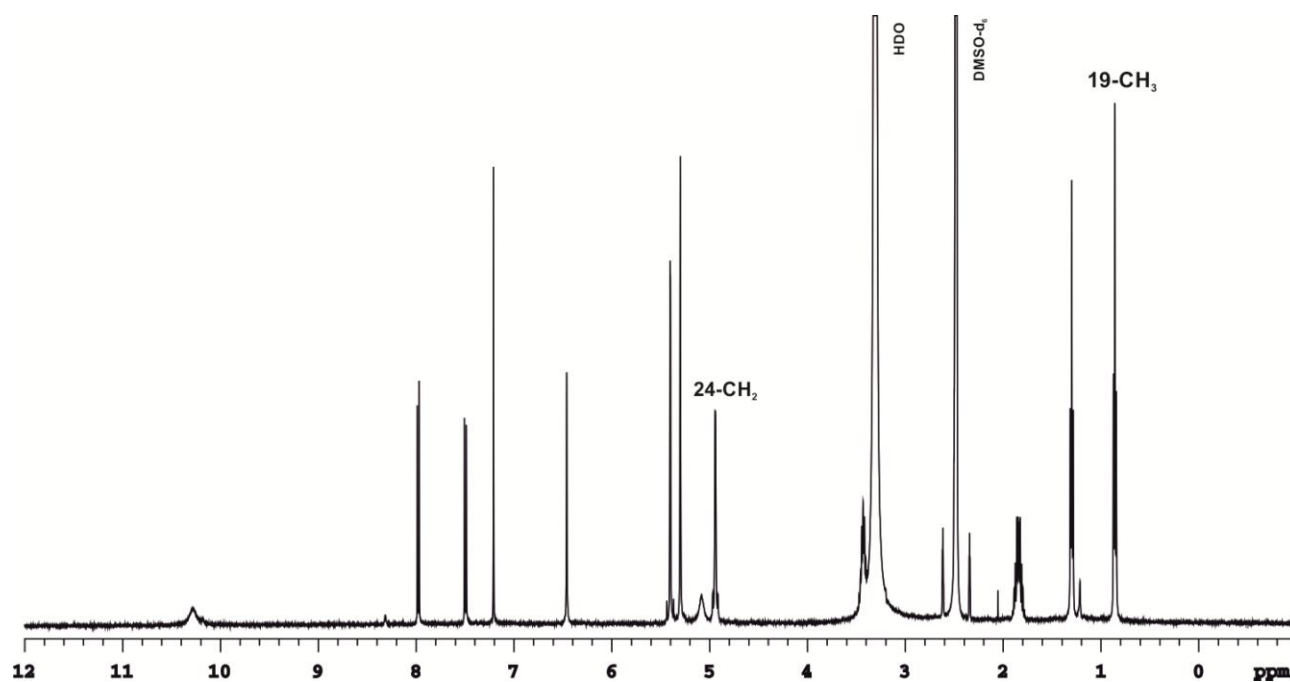

**Fig. S3b** The  $^1\text{H}$  NMR spectrum of metabolite **4** in  $\text{DMSO-d}_6$ .

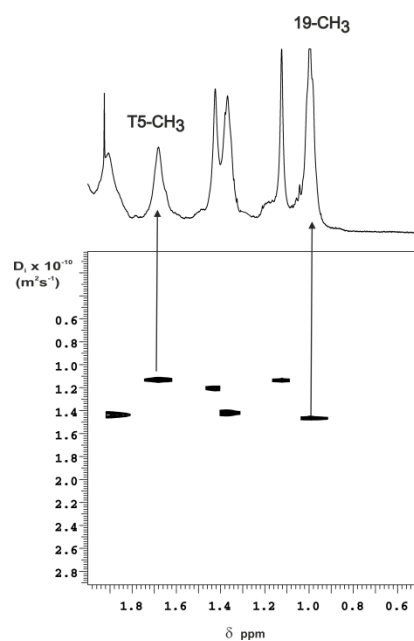

**Fig. S4** The part of the DOSY spectrum presenting result for compounds **1** and **2** after 5 days of incubation in buffered  $\text{D}_2\text{O}$ , 25 mM  $\text{NaCl}$  /25 mM  $\text{K}_3\text{PO}_4$ , at pH 6.

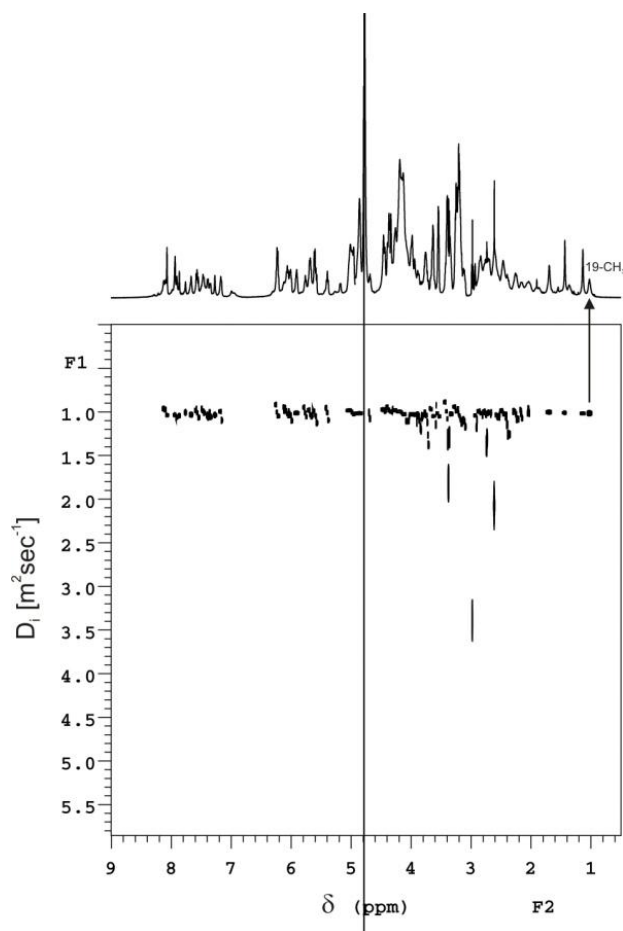

**Fig. S5** The full DOSY spectrum for decamer **1** and derivative **2** after filtering the sample of reaction solution, ML. The DOSY spectrum of a 1:1 complex of **1** and **2** in D<sub>2</sub>O buffer, pH 6, 25°C. The diffusion coefficient  $D_i$ ,  $1.0 \pm 0.1 \times 10^{-10} \text{ [m}^2\text{s}^{-1}\text{]}$  is equal for both components.

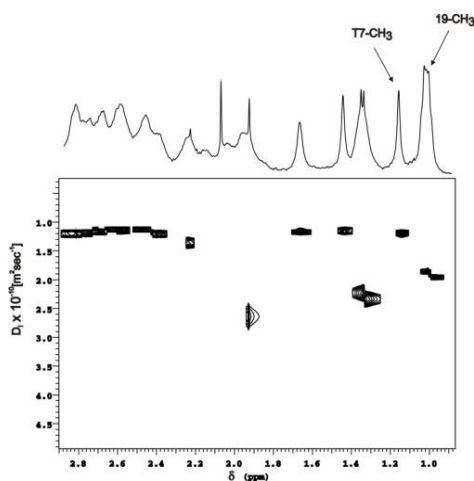

**Fig. S6a** The part of the DOSY result of compounds **1** and **3** at the start, in buffered D<sub>2</sub>O, 25 mM NaCl / 25 mM K<sub>3</sub>PO<sub>4</sub>, at pH 6.

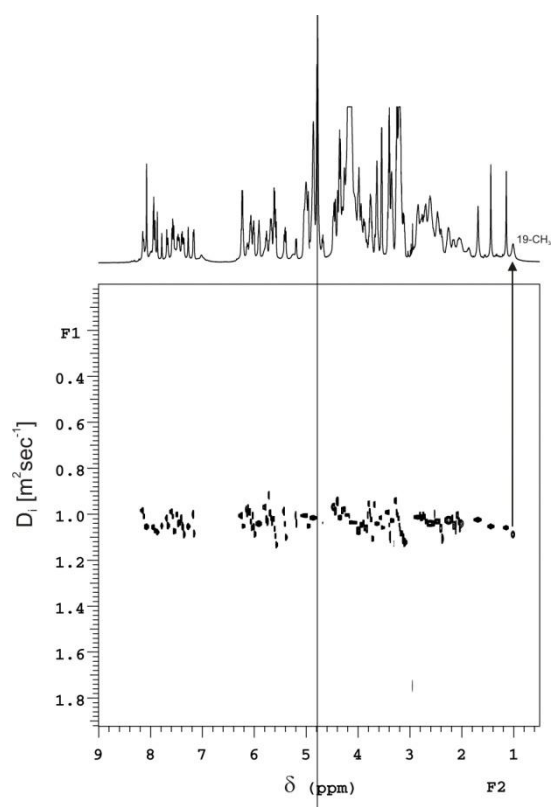

**Fig.S6b** The full DOSY spectrum for decamer **1** and derivative **3** after filtering the sample of reaction solution.

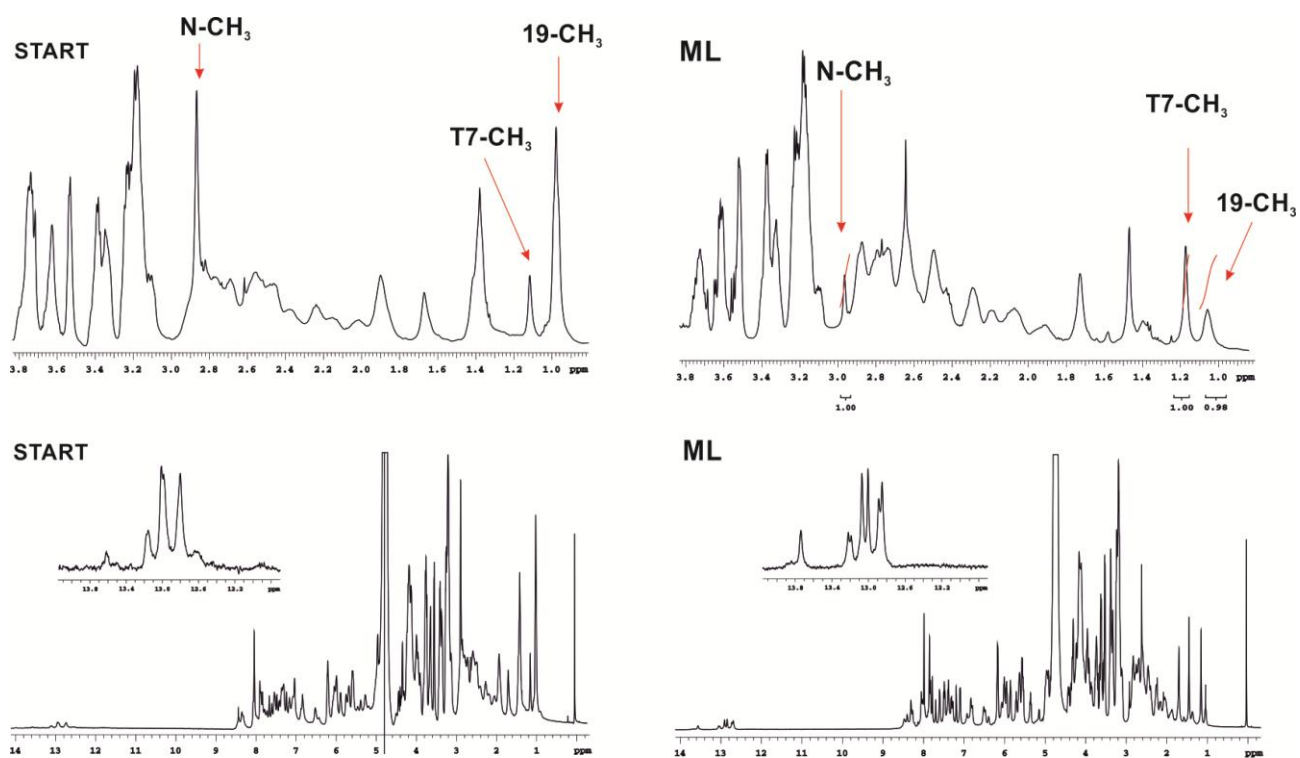

**Fig. S7** The shape of 1D NMR spectrum of reaction mixture of **2** with **1** at the start and in a mother liquor ML after filtering of reaction solution. Expansion of low frequency region of a spectrum is given in both cases.

**Table S1.** The  $^1\text{H}$  NMR chemical shifts  $\delta$  [ppm] of DNA **1** and SN38 derivative **2** from NOESY spectrum in buffered  $\text{D}_2\text{O}$ , at  $25^\circ\text{C}$  (**1:2** ratio) acquired after 4 days of incubation the sample at  $25^\circ\text{C}$ . \*

| Base      | H1'          | H2'          | H2''         | H3'          | H4'          | H5', H5''           | H6/8         | H2/5/Me      |
|-----------|--------------|--------------|--------------|--------------|--------------|---------------------|--------------|--------------|
| G1        | 5.998        | 2.760        | 2.833        | 4.955        | 4.334        | 3.883/ 3.991        | 8.065        | -            |
| C2        | 5.692        | 2.140        | 2.439        | 4.860        | 4.217        | 4.161               | 7.384        | 5.380        |
| G3        | 6.059        | 2.680        | 2.820        | 5.008        | 4.430        | 4.112/ 4.156        | 7.923        | -            |
| T4        | 6.055        | 2.058        | 2.559        | 4.885        | 4.239        | na/ 4.310           | 7.263        | 1.423        |
| <b>T5</b> | <b>6.222</b> | <b>2.550</b> | <b>2.571</b> | <b>4.984</b> | <b>4.191</b> | <b>4.098/ na</b>    | <b>7.492</b> | <b>1.679</b> |
| nick      | -----        | -----        | -----        | -----        | -----        | -----               | -----        | -----        |
| <b>G6</b> | <b>5.490</b> | <b>2.358</b> | <b>2.574</b> | <b>4.687</b> | <b>4.170</b> | <b>3.798/ 3.911</b> | <b>7.685</b> | <b>-</b>     |
| T7        | 6.023        | 2.158        | 2.520        | 4.853        | 4.235        | 4.003/ 4.114        | 7.338        | 1.122        |
| C8        | 5.742        | 2.021        | 2.391        | 4.853        | 4.111        | na/ na              | 7.439        | 5.590        |
| G9        | 5.898        | 2.626        | 2.695        | 4.999        | 4.364        | 4.075/ 4.133        | 7.925        | -            |
| C10       | 6.225        | 2.239        | 2.466        | 4.851        | 4.192        | 4.139/ 4.249        | 7.565        | 5.598        |

| Base       | H1'          | H2'          | H2''         | H3'          | H4'          | H5', H5''        | H6/8         | H2/5/Me      |
|------------|--------------|--------------|--------------|--------------|--------------|------------------|--------------|--------------|
| G11        | 6.002        | 2.755        | 2.828        | 4.955        | 4.333        | 3.880/ 3.991     | 8.064        | -            |
| C12        | 5.679        | 2.002        | 2.376        | 4.850        | 4.172        | 4.168            | 7.338        | 5.384        |
| G13        | 5.673        | 2.757        | 2.778        | 5.032        | 4.391        | 4.078/ 4.156     | 7.894        | -            |
| A14        | 6.203        | 2.646        | 2.820        | 4.913        | 4.436        | na/ na           | 8.065        | 7.739        |
| <b>C15</b> | <b>5.733</b> | <b>1.948</b> | <b>2.163</b> | <b>na</b>    | <b>4.165</b> | <b>na/ 4.303</b> | <b>7.183</b> | <b>5.045</b> |
|            |              |              |              |              |              |                  |              |              |
| <b>A16</b> | <b>5.601</b> | <b>2.598</b> | <b>2.715</b> | <b>4.965</b> | <b>4.387</b> | <b>na / na</b>   | <b>7.806</b> | <b>6.854</b> |
| A17        | 6.093        | 2.591        | 2.807        | 5.011        | 4.444        | na/ 4.289        | 8.092        | 7.622        |
| C18        | 5.584        | 1.856        | 2.272        | na           | 4.124        | na/ 4.240        | 7.168        | 5.176        |
| G19        | 5.889        | 2.583        | 2.686        | 4.972        | 4.337        | 4.038/ 4.118     | 7.858        | -            |
| C20        | 6.213        | 2.232        | 2.458        | 4.849        | 4.190        | 4.127 / 4.235    | 7.550        | 5.576        |

\* The G6-C15 and T5-A16 base pairs, in bold, are flanking both faces of a nick.

na-not assigned.

**Table S2.** The  $^1\text{H}$  NMR chemical shifts  $\delta$  [ppm] of changes induced in free DNA decamer and **2** after 4 days incubation in  $\text{D}_2\text{O}$  (**1:2** ratio).

| Base | H1'           | H2'           | H2''          | H3'    | H4'           | H5', H5''              | H6/8          | H2/5/Me |
|------|---------------|---------------|---------------|--------|---------------|------------------------|---------------|---------|
| G1   | -0.006        | -0.013        | -0.006        | -0.004 | -0.009        | 0.001 / -0.020         | -0.013        | -       |
| C2   | -0.003        | -0.011        | -0.020        | -0.008 | -0.010        | 0.001                  | -0.007        | -0.027  |
| G3   | -0.029        | -0.021        | -0.034        | -0.013 | -0.008        | -0.004 / -0.009        | -0.024        | -       |
| T4   | -0.008        | -0.026        | -0.048        | 0.014  | -0.035        | - / -0.003             | -0.005        | -0.023  |
| T5   | 0.020         | <b>0.052</b>  | -0.046        | -0.006 | -0.009        | -0.001 / -             | <b>0.067</b>  | -0.012  |
| nick | -----         | -----         | -----         | -----  | -----         | -----                  | -----         | -----   |
| G6   | <b>-0.342</b> | <b>-0.284</b> | <b>-0.068</b> | 0.017  | -0.037        | <b>-0.076 / -0.222</b> | 0.020         | -       |
| T7   | -0.045        | -0.022        | -0.037        | -0.018 | <b>-0.082</b> | - / 0.013              | <b>-0.204</b> | -0.025  |
| C8   | -0.018        | -0.045        | -0.027        | -0.015 | -0.022        | - / -                  | -0.036        | -0.046  |
| G9   | -0.006        | 0.012         | 0.003         | 0.009  | 0.010         | -0.003 / -0.001        | -0.013        | -       |
| C10  | -0.002        | -0.017        | 0.005         | 0.005  | -0.009        | 0.001 / -0.003         | -0.007        | -0.018  |

| Base | H1'           | H2'    | H2''          | H3'           | H4'           | H5', H5''        | H6/8          | H2/5/Me       |
|------|---------------|--------|---------------|---------------|---------------|------------------|---------------|---------------|
| G11  | -0.002        | -0.018 | -0.011        | -0.004        | -0.010        | -0.002 / -0.020  | -0.014        | -             |
| C12  | 0.016         | -0.013 | -0.009        | -0.001        | -0.009        | 0.024            | -0.029        | -0.044        |
| G13  | 0.012         | 0.019  | -0.037        | -0.015        | -0.003        | 0.014 / 0.010    | -0.016        | -             |
| A14  | -0.044        | -0.035 | <b>-0.128</b> | <b>-0.118</b> | <b>-0.057</b> | - / -            | <b>-0.093</b> | <b>-0.058</b> |
| C15  | <b>0.170</b>  | 0.010  | <b>-0.199</b> | ?             | 0.021         | - / 0.000        | 0.027         | <b>-0.245</b> |
| A16  | <b>-0.230</b> | 0.024  | <b>-0.093</b> | -0.043        | 0.029         | - / -            | <b>-0.224</b> | <b>-0.204</b> |
| A17  | -0.040        | -0.048 | -0.031        | -0.026        | -0.015        | - / <b>0.073</b> | <b>-0.069</b> | <b>-0.081</b> |
| C18  | -0.018        | 0.001  | -0.007        | ?             | -0.018        | - / -0.017       | 0.001         | -0.024        |
| G19  | -0.015        | -0.031 | -0.006        | -0.018        | -0.017        | 0.008 / -0.001   | -0.010        | -             |
| C20  | -0.014        | -0.024 | -0.003        | 0.003         | -0.011        | -0.003 / -0.005  | -0.005        | -0.014        |



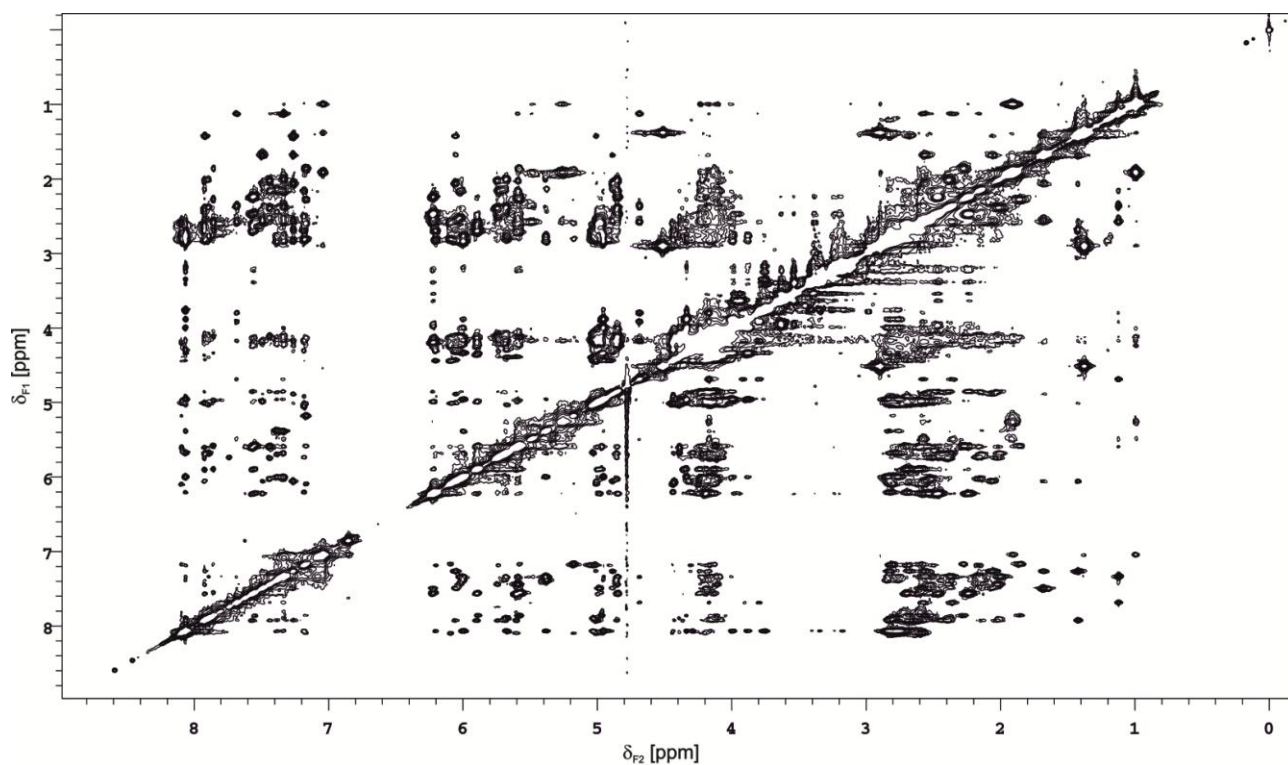

**Fig. S8** The NOESY spectrum of the sample 1+2 after 4 days of incubation (1:2 ratio).

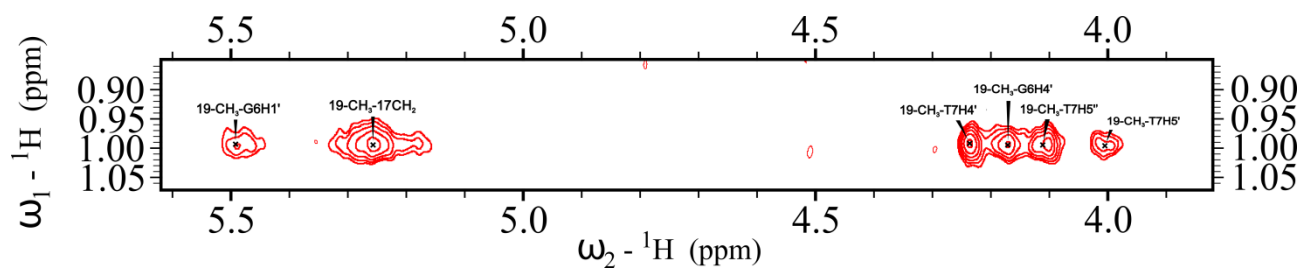

**Fig. S8a** The example of intermolecular cross-peaks in complex 1+2 after 4 days of incubation(1:2 ratio), before filtering the reaction solution ,see Table 1 in manuscript.

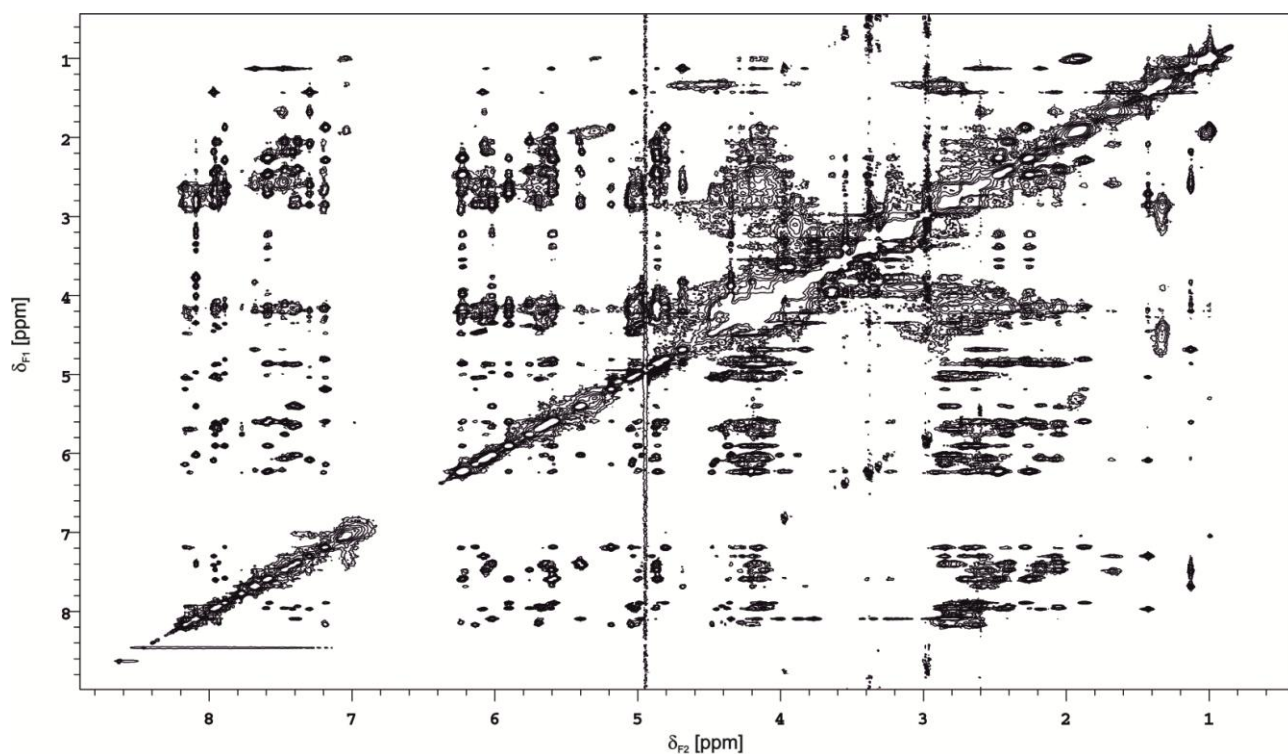

**Fig S9** The NOESY spectrum of the sample 1+3 (see experimental section) after 24h.

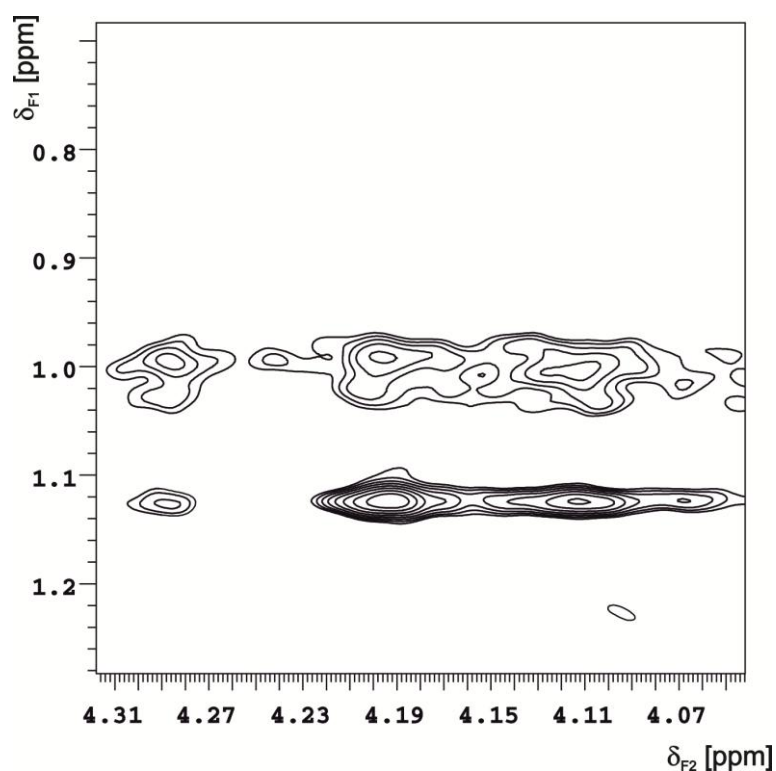

**Fig. S10** The example of the cross-peaks in sample 1+3 (see experimental section). The cross peaks at 1.0 and 1.02 ppm are the intermolecular cross peaks, not assigned, of two different methyl groups 19-CH<sub>3</sub> due to **4** and SN38 and cross peaks at 1.12 ppm are the intramolecular cross peaks of T7-CH<sub>3</sub> in **1**.

**Table S3.** The most populated cluster energy from PBSA and GBSA analysis.

| Structure | Energy [kcal/mol] |                 |
|-----------|-------------------|-----------------|
|           | PBSA              | GBSA            |
| NHMe-1    | -35.56 +/- 2.97   | -35.68 +/- 3.03 |
| NHMe-2    | -34.43 +/- 3.19   | -33.77 +/- 2.60 |
| NHMe-3    | -37.69 +/- 2.80   | -34.84 +/- 2.68 |
| NHMe-4    | -34.21 +/- 3.33   | -35.01 +/- 2.50 |

The above calculations and NOE effects in Table 4 ( manuscript) point to structures 1 and 3 as the best ones. The HB also favors structure 3.

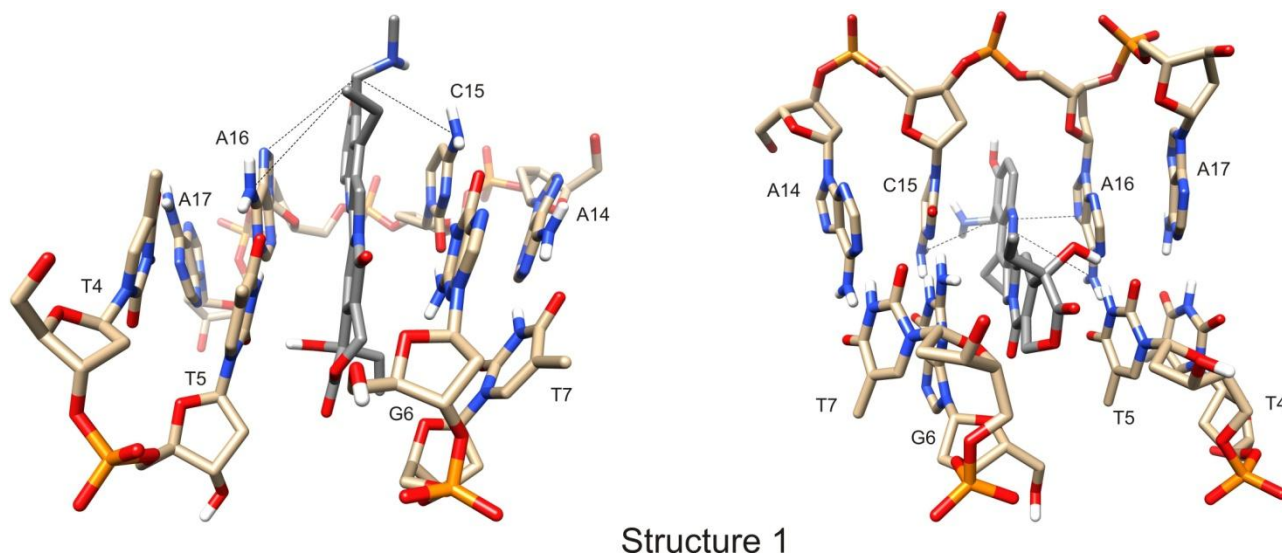

**Fig. S11** The best structure from modeling showing potential sites of hybrid formation in a molecular complex **1+2**

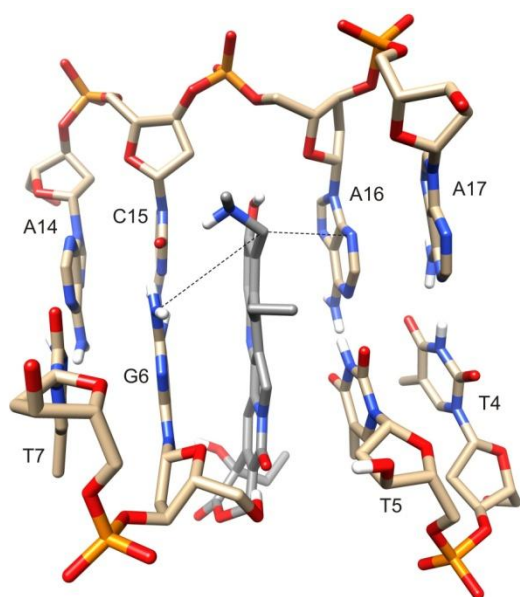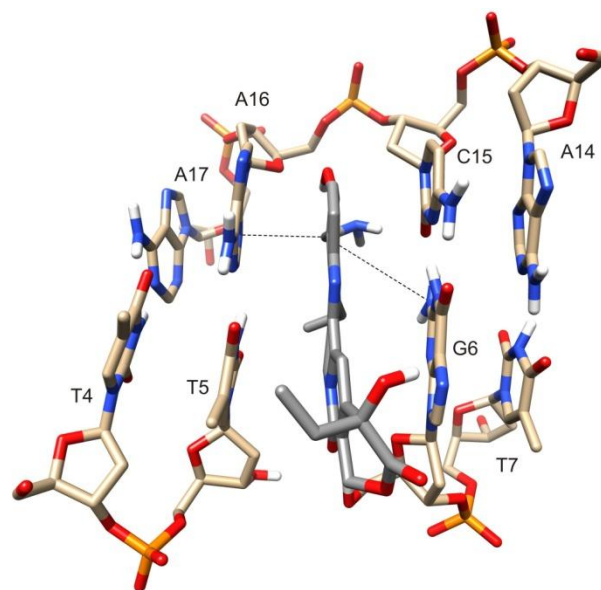

Structure 3

**Fig. S12** The second best structure from modeling showing potential sites of hybrid formation in a molecular complex **1+2**

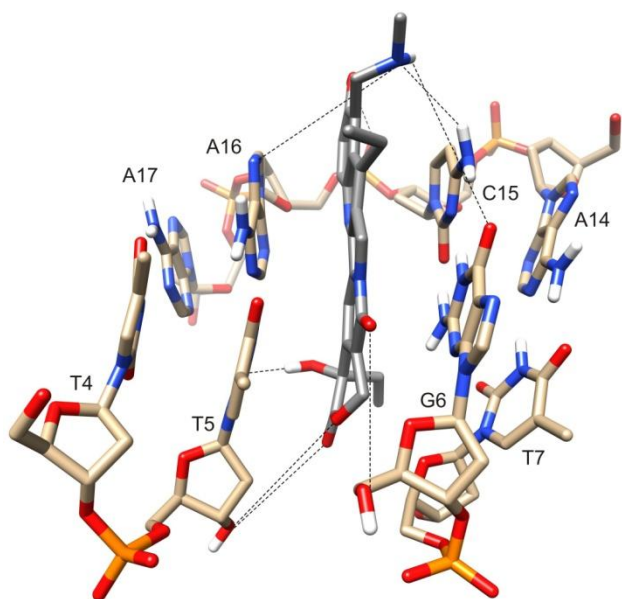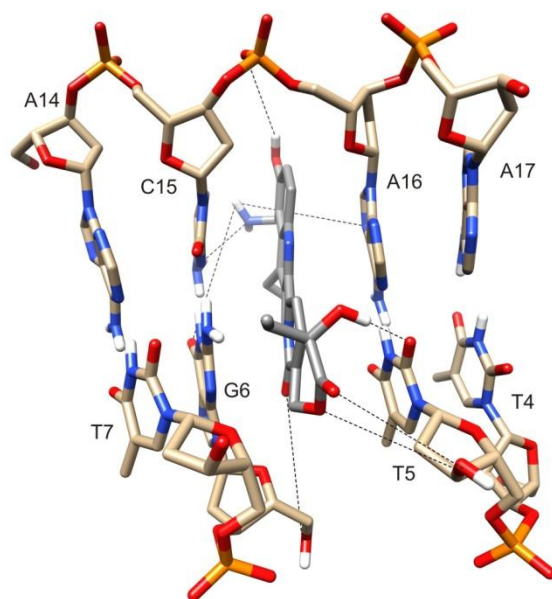

Structure 1

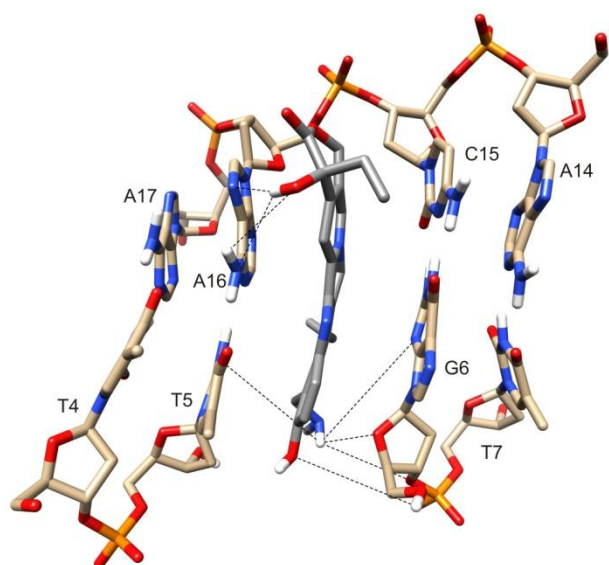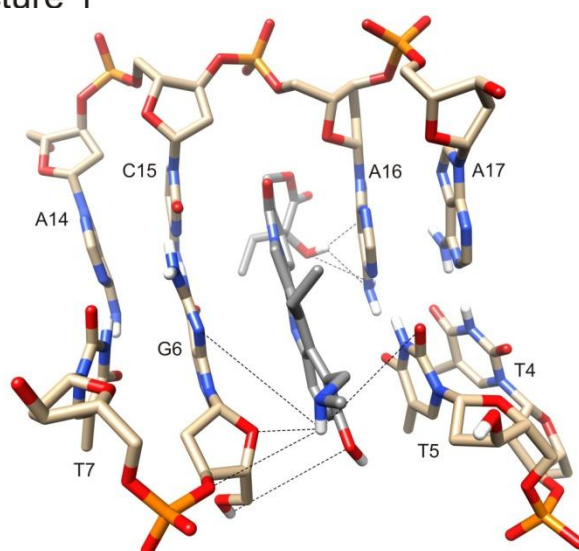

Structure 2



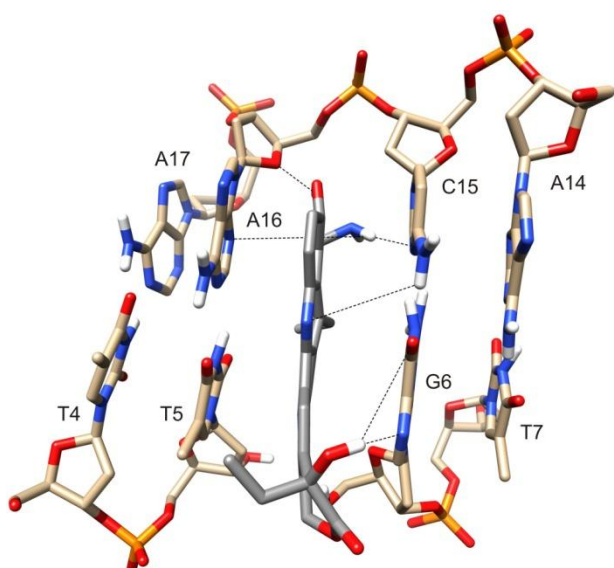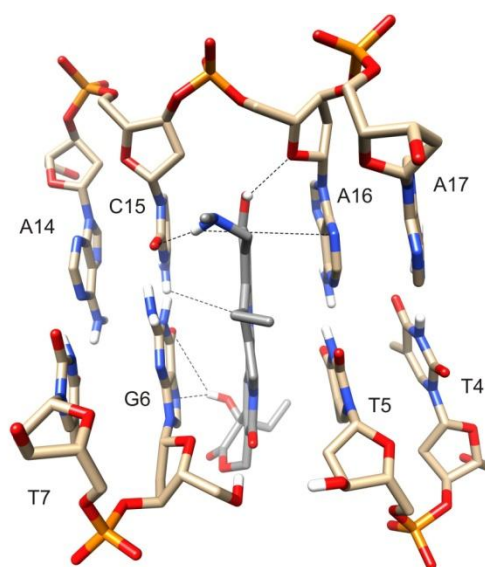

Structure 3

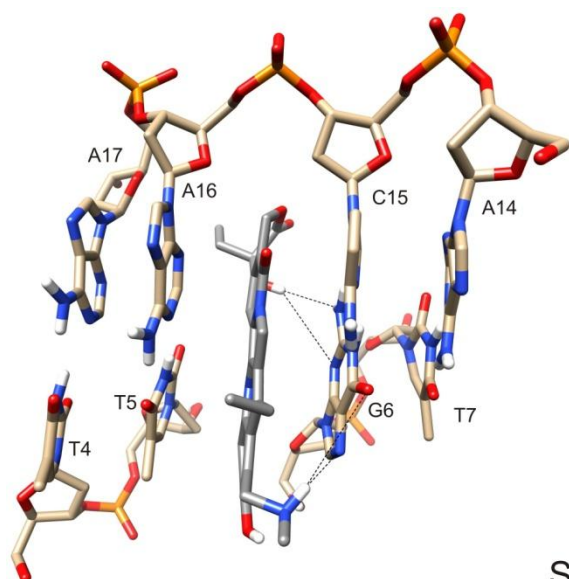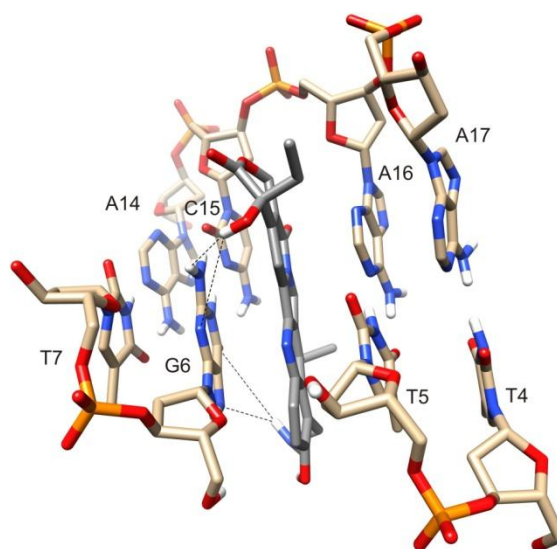

Structure 4

**Fig. S13** The hydrogen bonding in structures best representing the most populated cluster obtained by cluster analysis in a molecular complex **1+2**.

**Table S4 .** The real hydrogen bonds in **1+2** complex from PM7 calculations.

| Atom names       |                                 | Structure 1   |            |
|------------------|---------------------------------|---------------|------------|
| DNA              | CMP                             | HB length [Å] | population |
| T5- <u>O</u> 2   | 20 - <u>O</u> <u>H</u>          | 2.08 +/- 0.29 | 75.5 %     |
| G6- <u>H</u> O5' | 16 >C= <u>O</u>                 | 1.93 +/- 0.27 | 44.4 %     |
| A16- <u>N</u> 7  | 9-CH <sub>2</sub> N <u>H</u> Me | 2.26 +/- 0.10 | 31.5 %     |
| T5- <u>H</u> O3' | 21 >C= <u>O</u>                 | 2.48 +/- 0.42 | 19.1 %     |
| T5- <u>H</u> O3' | 21 > <u>O</u>                   | 2.85 +/- 0.28 | 14.0 %     |
| A16- <u>O</u> P2 | 10 - <u>O</u> <u>H</u>          | 2.49 +/- 0.34 | 13.6 %     |
| C15- <u>O</u> P2 | 10 - <u>O</u> <u>H</u>          | 2.32 +/- 0.39 | 7.5 %      |
| A16- <u>O</u> 5' | 10 - <u>O</u> <u>H</u>          | 2.90 +/- 0.27 | 6.8 %      |
| G6- <u>O</u> 6   | 9-CH <sub>2</sub> N <u>H</u> Me | 2.49 +/- 0.28 | 4.1 %      |
|                  |                                 | Structure 2   |            |
| A16- <u>N</u> 7  | 20 - <u>O</u> <u>H</u>          | 2.32 +/- 0.29 | 63.5 %     |
| T5- <u>O</u> 2   | 9-CH <sub>2</sub> N <u>H</u> Me | 2.23 +/- 0.11 | 44.6 %     |
| A16- <u>H</u> 62 | 20 - <u>O</u> <u>H</u>          | 2.93 +/- 0.35 | 30.0 %     |
| G6- <u>N</u> 3   | 9-CH <sub>2</sub> N <u>H</u> Me | 2.27 +/- 0.12 | 20.6 %     |
| G6- <u>O</u> 4'  | 9-CH <sub>2</sub> N <u>H</u> Me | 2.18 +/- 0.19 | 18.8 %     |
| G6- <u>H</u> O5' | 10 - <u>O</u> <u>H</u>          | 1.83 +/- 0.22 | 16.8 %     |
| G6- <u>O</u> 3'  | 9-CH <sub>2</sub> N <u>H</u> Me | 2.65 +/- 0.31 | 10.2 %     |
| G6- <u>O</u> 4'  | 10 - <u>O</u> <u>H</u>          | 1.81 +/- 0.25 | 6.8 %      |
| G6- <u>O</u> 5'  | 10 - <u>O</u> <u>H</u>          | 1.78 +/- 0.29 | 6.2 %      |
|                  |                                 | Structure 3   |            |
| C15- <u>O</u> 2  | 9-CH <sub>2</sub> N <u>H</u> Me | 2.19 +/- 0.11 | 88.1 %     |
| A16- <u>O</u> 4' | 10 - <u>O</u> <u>H</u>          | 2.08 +/- 0.33 | 78.2 %     |
| G6- <u>N</u> 7   | 20 - <u>O</u> <u>H</u>          | 2.21 +/- 0.14 | 75.3 %     |
| G6- <u>H</u> O5' | 16 >C= <u>O</u>                 | 1.74 +/- 0.17 | 71.9 %     |
| G6- <u>O</u> 6   | 20 - <u>O</u> <u>H</u>          | 3.08 +/- 0.38 | 24.4 %     |
| A16- <u>N</u> 3  | 9-CH <sub>2</sub> N <u>H</u> Me | 2.37 +/- 0.24 | 3.2 %      |
| A16- <u>O</u> 5' | 10 - <u>O</u> <u>H</u>          | 3.03 +/- 0.34 | 3.1 %      |
| G6- <u>H</u> O5' | 21 > <u>O</u>                   | 2.27 +/- 0.36 | 2.9 %      |
|                  |                                 | Structure 4   |            |
| G6- <u>N</u> 7   | 9-CH <sub>2</sub> N <u>H</u> Me | 2.38 +/- 0.23 | 47.7 %     |
| G6- <u>O</u> 6   | 9-CH <sub>2</sub> N <u>H</u> Me | 2.51 +/- 0.33 | 29.1 %     |
| G6- <u>H</u> 21  | 20 - <u>O</u> <u>H</u>          | 2.54 +/- 0.46 | 15.1 %     |
| G6- <u>N</u> 3   | 20 - <u>O</u> <u>H</u>          | 2.41 +/- 0.34 | 13.9 %     |
| T5- <u>O</u> 4   | 9-CH <sub>2</sub> N <u>H</u> Me | 2.16 +/- 0.13 | 13.3 %     |
| G6- <u>H</u> O5' | 10 - <u>O</u> <u>H</u>          | 2.71 +/- 0.50 | 5.2 %      |

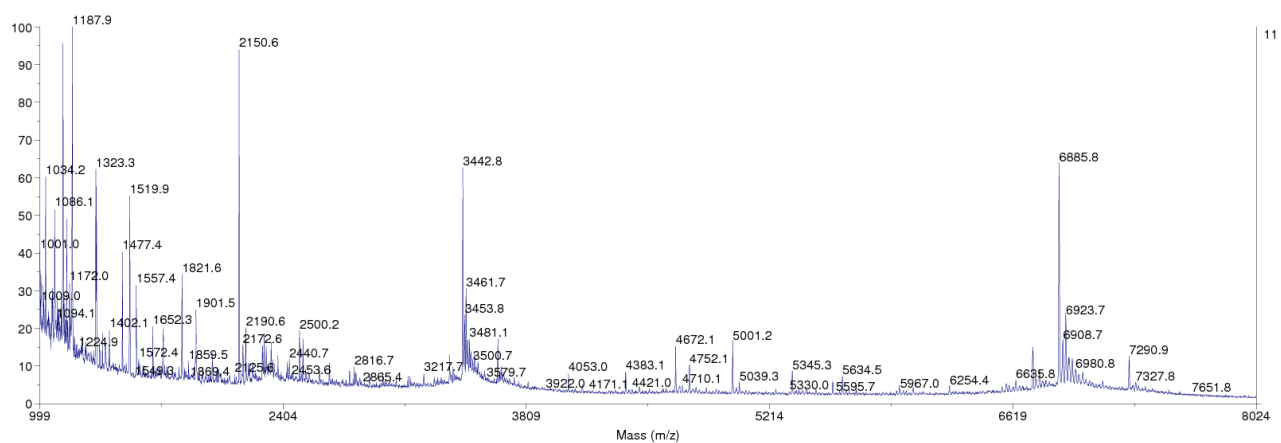

**Fig. S14** The MALDI MS spectrum of lyophilized ML showing neat DNA decamer ( $m/z=6885.8$ ,  $[M-H]^-$ ) and alkylated biohybrid ( $m/z= 7290.9$ ,  $[M-H]^-$ ) with compound **2**.



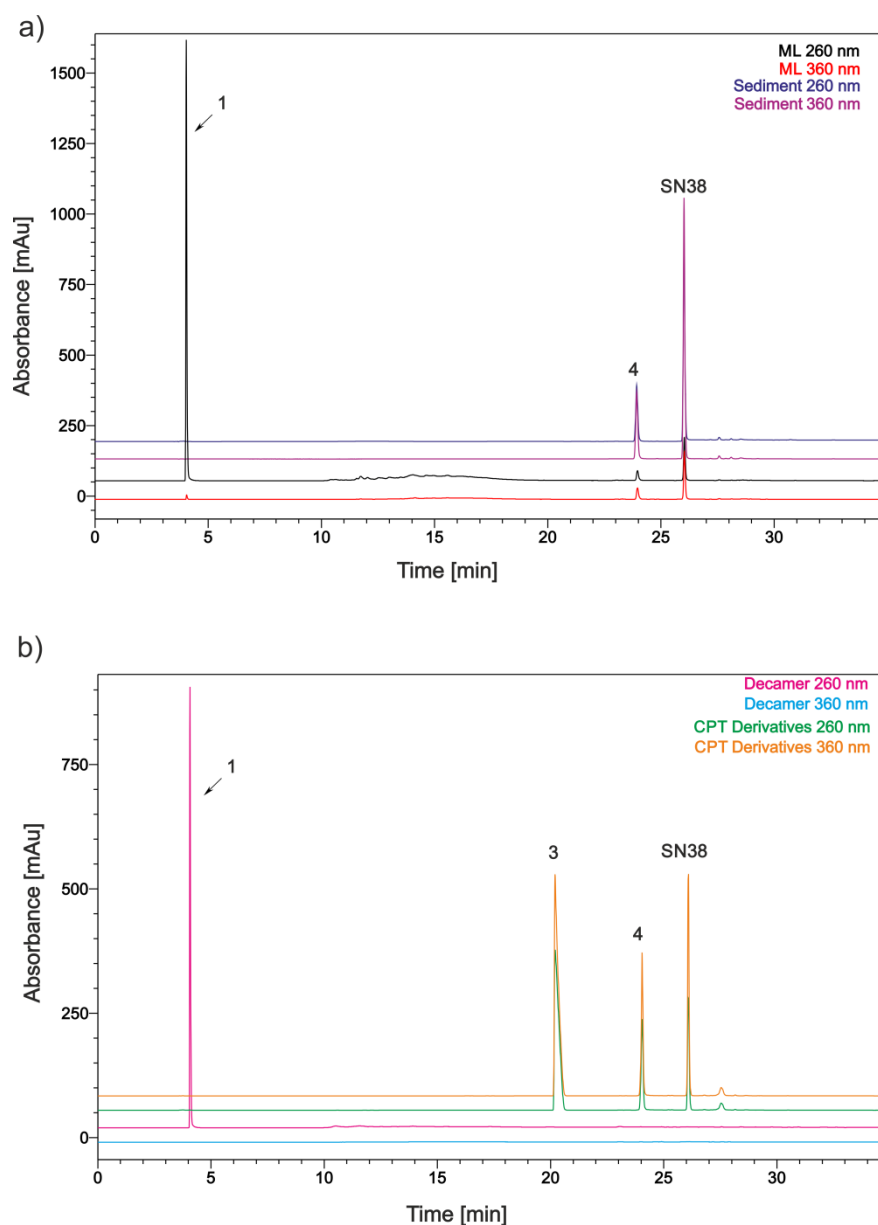

**Fig. S15** Upper panel: The overlay of two HPLC runs of reaction **1** + **3**; ML in black and red and sediment in navy blue and purple. The ML run evidences compounds strongly bound to nicked DNA which partly precipitate into sediment. Lower panel: The HPLC run of reference compounds.

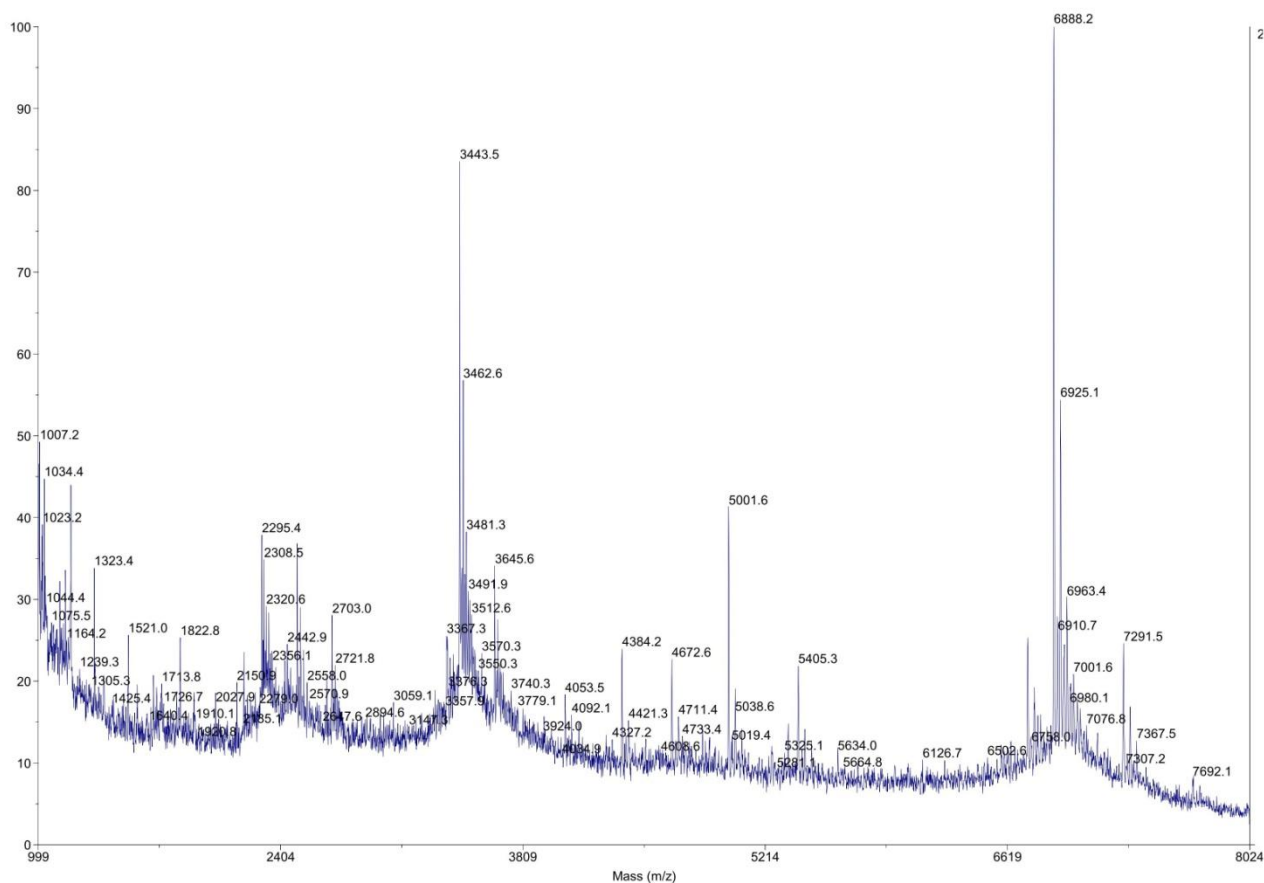

**Fig. S16a** The MALDI MS spectrum of lyophilized ML showing neat DNA decamer ( $m/z=6888.2$ ) and alkylated biohybrid with compound **3** ( $m/z=7291.5$ ).

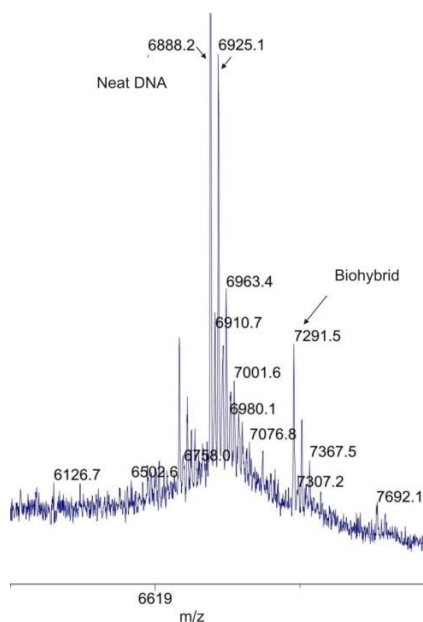

**Fig. S16b** The part of MALDI MS spectrum of lyophilized ML showing neat DNA decamer ( $m/z=6888.2$ , peak cut for clarity) and alkylated biohybrid with compound **3**.
